# Supplementary material for: Design of orthogonally jointed 2D transition metal dichalcogenide heterojunctions for enhanced photoelectrochemical water reduction
Source: Royal Society of Chemistry journal article supplement (doi:10.1039/d5cp02368h), 2025-01-01
Supplement: d5cp02368h1.pdf [file d5cp02368h1.pdf]

# **Design of orthogonally jointed 2D transition metal dichalcogenide heterojunctions for enhanced Photoelectrochemical water reduction**

Chih-hung Wu,<sup>a</sup> Keng-Hung Chang,<sup>a</sup> Yu-Hao Tu,<sup>b</sup> Chen-Hao Yeh,<sup>c</sup> Heng-Jui Liu<sup>\*a</sup>

<sup>a</sup> *Department of Materials Science and Engineering, National Chung Hsing University, Taichung 402202, Taiwan*

<sup>b</sup> *College of Semiconductor Research, National Tsing Hua University, Hsinchu 300044, Taiwan*

<sup>c</sup> *Department of Materials Science and Engineering, Feng Chia University, Taichung 407012, Taiwan*

Corresponding Author

\*e-mail: [hengjui0109@dragon.nchu.edu.tw](mailto:hengjui0109@dragon.nchu.edu.tw)

**Table S1** Surface elemental compositions for all samples from XPS survey scan

| Sample                                       | Mo (at%) | W (at%) | S (at%) | O (at%) |
|----------------------------------------------|----------|---------|---------|---------|
| MoS <sub>2</sub> /p-Si                       | 37.6     | —       | 52.7    | 9.7     |
| WS <sub>2</sub> /p-Si                        | —        | 34.0    | 41.8    | 24.2    |
| orth-MoS <sub>2</sub> /WS <sub>2</sub> /p-Si | 36.9     | 3.9     | 49.2    | 10.1    |
| orth-WS <sub>2</sub> /MoS <sub>2</sub> /p-Si | 3.6      | 36.2    | 44.1    | 16.1    |

**Table S2** Fitting result of Nyquist plots for all samples

| Sample                                       | $R_s$ ( $\Omega$ ) | $R_{ct1}$ ( $\Omega$ ) | $R_{ct2}$ ( $\Omega$ ) |
|----------------------------------------------|--------------------|------------------------|------------------------|
| MoS <sub>2</sub> /p-Si                       | 190                | 2634                   | —                      |
| WS <sub>2</sub> /p-Si                        | 265.8              | 1937                   | —                      |
| orth-MoS <sub>2</sub> /WS <sub>2</sub> /p-Si | 124.2              | 263.3                  | 745.9                  |
| orth-WS <sub>2</sub> /MoS <sub>2</sub> /p-Si | 134.8              | 348.6                  | 473.3                  |

**Table S3** Calculated adsorption energy (in eV) of a hydrogen atom on all potential active sites of three different WS<sub>2</sub>/MoS<sub>2</sub> heterostructures.

| Vertically joined WS <sub>2</sub> /MoS <sub>2</sub> |                       | Laterally stacking WS <sub>2</sub> /MoS <sub>2</sub> |                       | Horizontally joined WS <sub>2</sub> /MoS <sub>2</sub> |                       |
|-----------------------------------------------------|-----------------------|------------------------------------------------------|-----------------------|-------------------------------------------------------|-----------------------|
| Site                                                | E <sub>ads</sub> (eV) | Site                                                 | E <sub>ads</sub> (eV) | Site                                                  | E <sub>ads</sub> (eV) |
| <b>H1</b>                                           | -4.32                 | <b>H1</b>                                            | -1.52                 | <b>H1</b>                                             | -1.52                 |
| <b>H2</b>                                           | -2.47                 | <b>H2</b>                                            | -1.50                 | <b>H2</b>                                             | -1.52                 |
| <b>H3</b>                                           | -2.73                 | <b>T1</b>                                            | -1.28                 | <b>H3</b>                                             | -1.58                 |
| <b>H4</b>                                           | -2.89                 |                                                      |                       | <b>T1</b>                                             | -1.54                 |
| <b>H5</b>                                           | -3.29                 |                                                      |                       | <b>T2</b>                                             | -1.50                 |
| <b>H6</b>                                           | -3.29                 |                                                      |                       | <b>T3</b>                                             | -1.75                 |
| <b>T1</b>                                           | -4.32                 |                                                      |                       |                                                       |                       |
| <b>T2</b>                                           | -2.73                 |                                                      |                       |                                                       |                       |
| <b>T3</b>                                           | -3.17                 |                                                      |                       |                                                       |                       |
| <b>T4</b>                                           | -2.32                 |                                                      |                       |                                                       |                       |
| <b>T5</b>                                           | -2.45                 |                                                      |                       |                                                       |                       |

**Table S4** Convergence tests for various Monkhorst-Pack k-points for the adsorption energy of hydrogen atom on the most stable adsorption site on the WS<sub>2</sub>/MoS<sub>2</sub> heterostructure.

|           | Vertically joined<br>WS <sub>2</sub> /MoS <sub>2</sub> | Laterally stacking<br>WS <sub>2</sub> /MoS <sub>2</sub> | Horizontally joined<br>WS <sub>2</sub> /MoS <sub>2</sub> |
|-----------|--------------------------------------------------------|---------------------------------------------------------|----------------------------------------------------------|
| grid      | E <sub>ads</sub> (eV)                                  | E <sub>ads</sub> (eV)                                   | E <sub>ads</sub> (eV)                                    |
| 3 × 3 × 1 | -4.321                                                 | -1.520                                                  | -1.755                                                   |
| 4 × 4 × 1 | -4.322                                                 | -1.521                                                  | -1.754                                                   |
| 5 × 5 × 1 | -4.322                                                 | -1.521                                                  | -1.754                                                   |
| 6 × 6 × 1 | -4.322                                                 | -1.520                                                  | -1.754                                                   |
| 7 × 7 × 1 | -4.322                                                 | -1.521                                                  | -1.754                                                   |

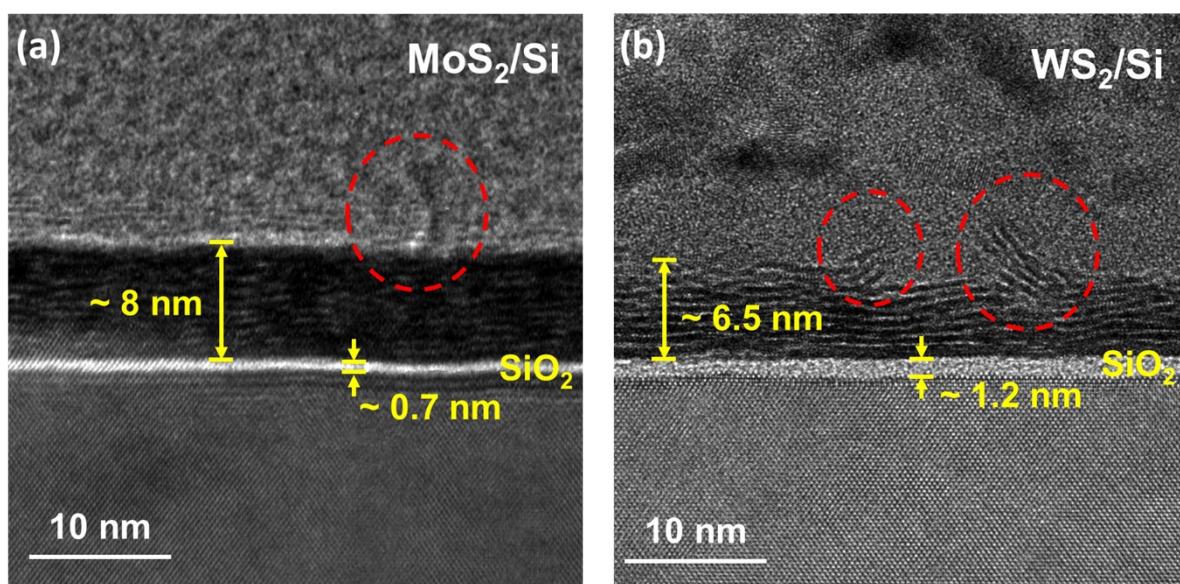

**Fig. S1** Cross-sectional HR-TEM images of single-component (a) MoS<sub>2</sub>/p-Si and (b) WS<sub>2</sub>/p-Si heterostructures. The images reveal that MoS<sub>2</sub> and WS<sub>2</sub> initially follow a layer-by-layer growth mode, maintaining a horizontally stacking structure below a critical thickness of ~8 nm and ~6.5 nm, respectively. However, as the growth approaches these critical thicknesses, slight vertical protrusions also emerge, serving as seeds for the subsequent formation of vertically standing TMD nanosheets. **Note that an ultrathin SiO<sub>2</sub> layer of below 1.2 nm is inevitably formed during the growth process of these TMD layers.**

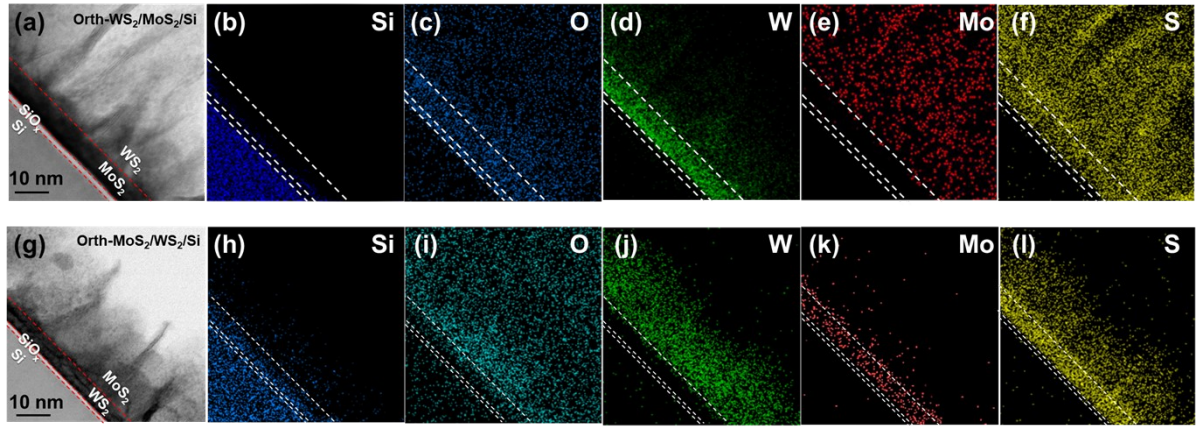

**Fig. S2.** (a–f) Cross-sectional bright-field (BF) HR-TEM image and corresponding EDS elemental maps of Si, O, W, Mo, and S for the orth-WS<sub>2</sub>/MoS<sub>2</sub>/Si heterostructure. (g–l) Cross-sectional BF HR-TEM image and EDS elemental maps of Si, O, W, Mo, and S for the orth-MoS<sub>2</sub>/WS<sub>2</sub>/Si heterostructure. The red and white dashed lines are aligned at identical relative positions across each panel to guide the eye in identifying the layer constituents. An ultrathin SiO<sub>x</sub> interlayer can be observed between the first TMD layer and the Si substrate, appearing as the brightest contrast in the BF images, with overlapping Si and O signals confirmed in the corresponding EDS maps.

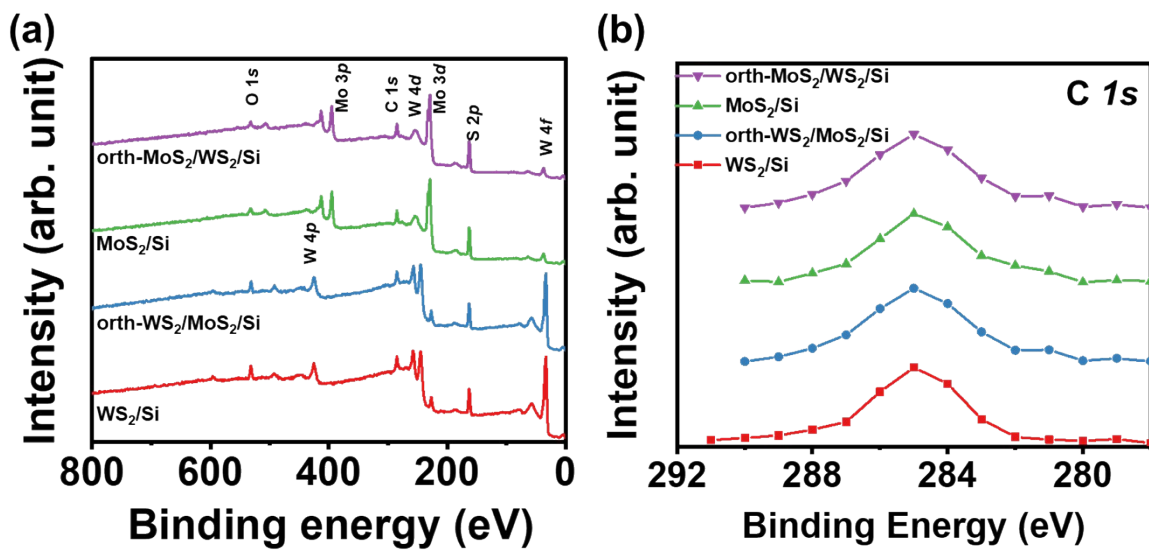

**Fig. S3.** (a) the survey scans and (b) the C 1s spectra for all samples. In the C 1 spectra, all curves show a characteristic peak at 284.8 eV from adventitious carbon, indicating similar levels of surface contamination across all samples.

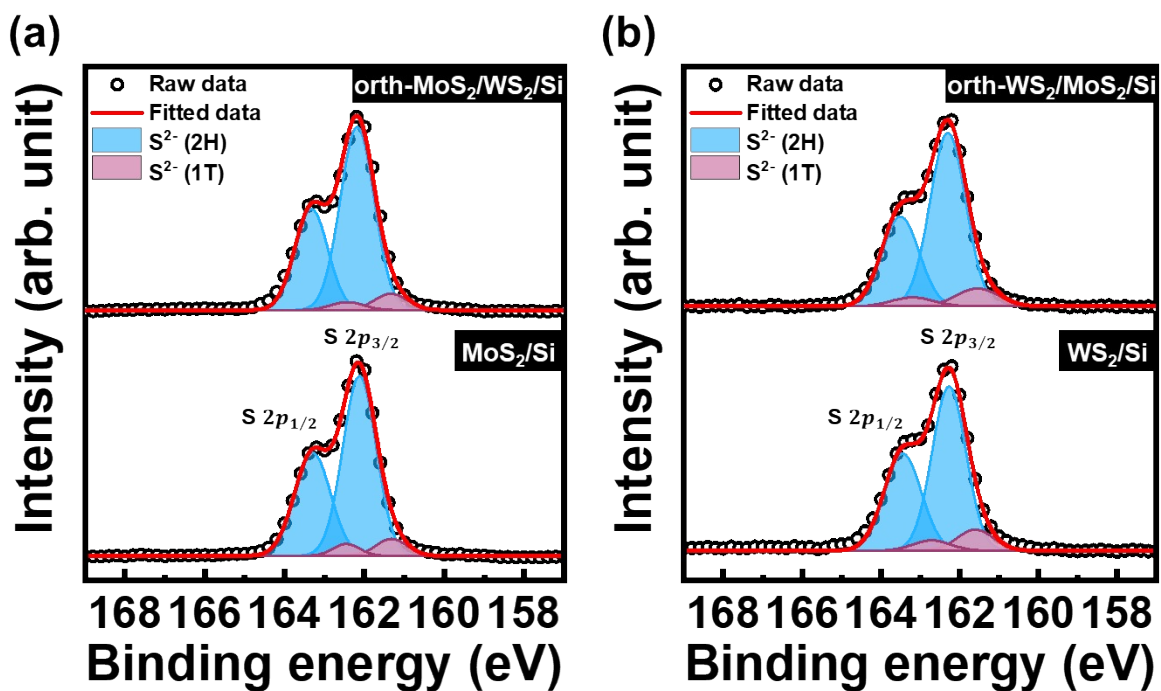

**Fig. S4.** (a) S 2p XPS spectra for the orth-MoS<sub>2</sub>/WS<sub>2</sub>/p-Si heterostructure and single-component MoS<sub>2</sub>/p-Si heterostructure. (b) S 2p XPS spectra for the orth-WS<sub>2</sub>/MoS<sub>2</sub>/p-Si heterostructure and single-component WS<sub>2</sub>/p-Si heterostructure.

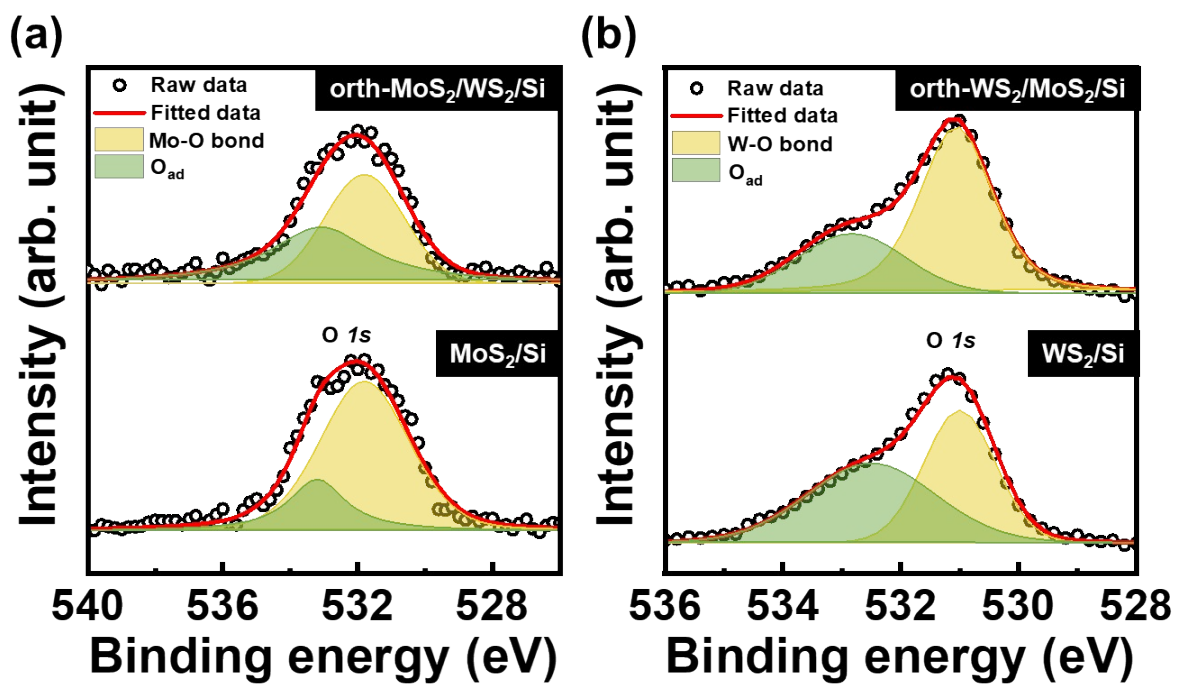

**Fig. S5.** (a) O 1s XPS spectra for the orth-MoS<sub>2</sub>/WS<sub>2</sub>/p-Si heterostructure and single-component MoS<sub>2</sub>/p-Si heterostructure. (b) O 1s XPS spectra for the orth-WS<sub>2</sub>/MoS<sub>2</sub>/p-Si heterostructure and single-component WS<sub>2</sub>/p-Si heterostructure.

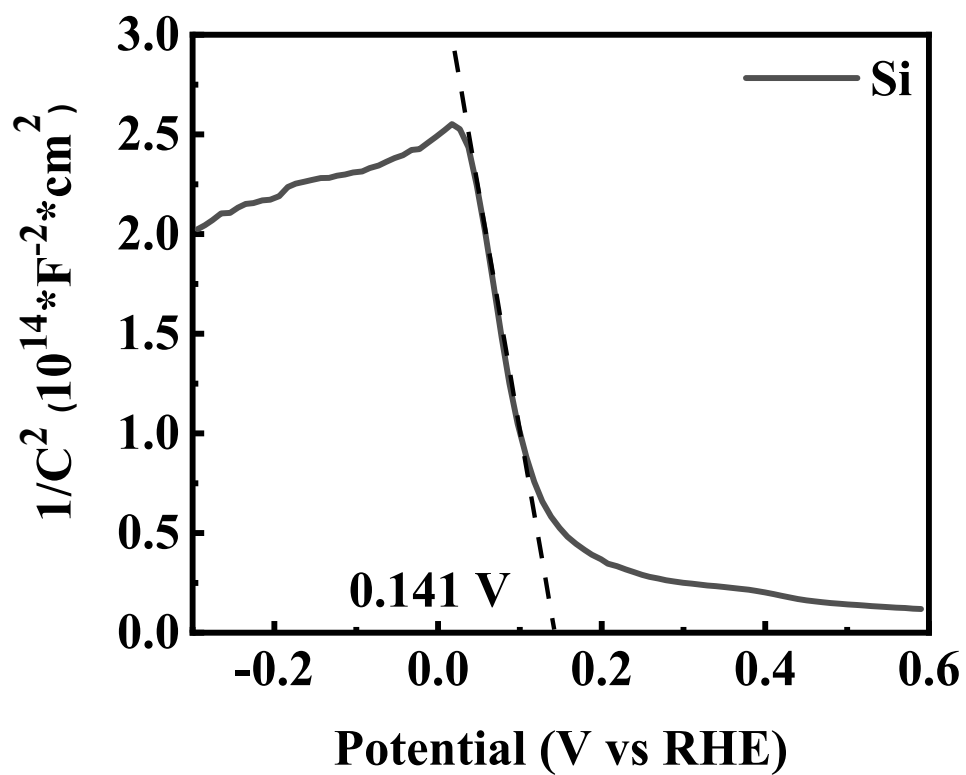

**Fig. S6** Mott-Schottky plot of blank p-Si substrate.

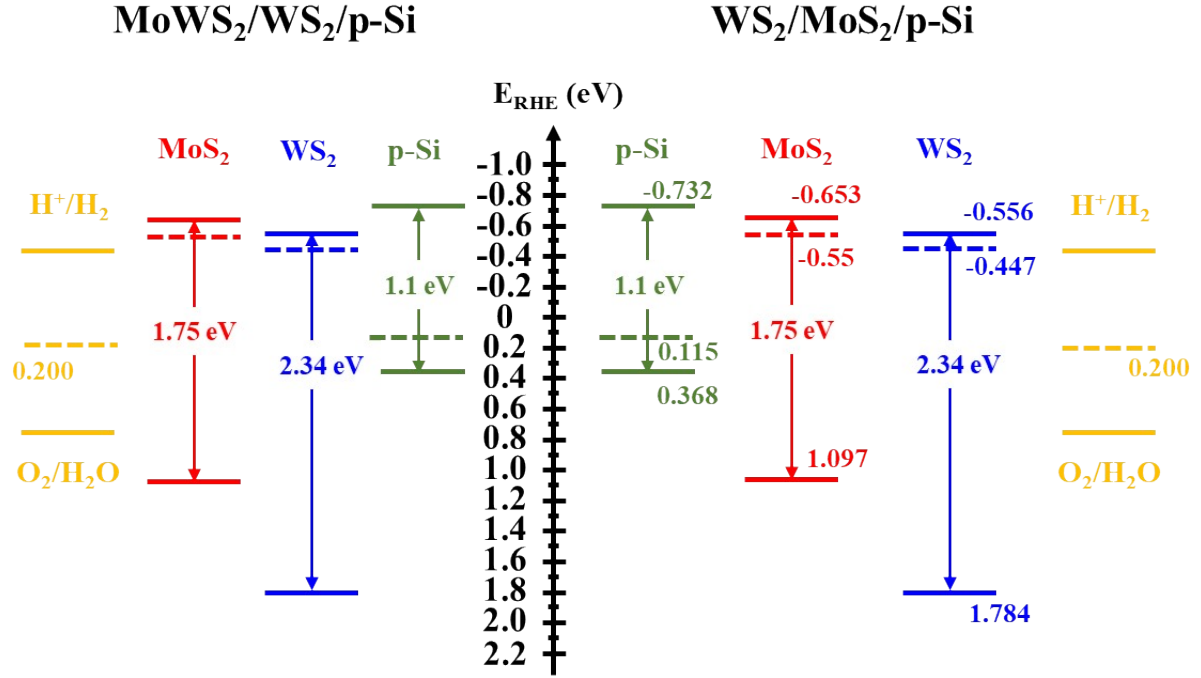

**Fig. S7** Band alignment diagrams relative to  $E_{\text{RHE}}$  of orth- $\text{WS}_2/\text{MoS}_2/\text{p-Si}$  (right) and orth- $\text{MoS}_2/\text{WS}_2/\text{p-Si}$  (left) heterostructures are constructed according to the analysis of the Mott-Schottky plots of the single-component  $\text{WS}_2/\text{p-Si}$  and  $\text{MoS}_2/\text{p-Si}$  heterostructures. The details are unveiled below:

#### Analysis of Mott-Schottky measurement

1. The flat-band potential ( $V_{fb}$ ) of the single-component  $\text{WS}_2/\text{p-Si}$  and  $\text{MoS}_2/\text{p-Si}$  heterostructures electrode is determined using the Mott-Schottky equation:<sup>1</sup>

$$C^{-2} = \frac{2(V - V_{fb} - kT/e)}{e\epsilon_0\epsilon_r N_D A^2}$$

Here,  $C$  is the space charge layer capacitance from Mott-Schottky measurements,  $e$  is the elementary charge ( $\sim 1.658 \times 10^{-19}$  C),  $\epsilon_0$  is the vacuum permittivity ( $\sim 8.85 \times 10^{-14}$  F/cm),  $\epsilon_r$  is the relative permittivity (5.5 for  $\text{MoS}_2$  and 5.9 for  $\text{WS}_2$ ),  $V$  is the applied voltage,  $k$  is Boltzmann's constant ( $\sim 8.62 \times 10^{-5}$  eV/K),  $N_D$  is the carrier density,  $T$  is room temperature (300 K), and  $A$  is the electrode-electrolyte contact area.

The flat-band potential is obtained from the x-intercept ( $V_0$ ) of the linear region of the Mott-Schottky plot using:

$$V_0 = V_{fb} + kT/e$$

From this,  $V_{fb}$  values are -0.55 and -0.47 V vs. RHE for  $\text{MoS}_2$  and  $\text{WS}_2$ , respectively (with  $V_0$  at -0.524 V and -0.421 V).

2. The donor carrier concentration ( $N_D$ ) is derived from the slope of the Mott-Schottky plot (

$2/e\epsilon_0\epsilon_r N_D A^2$ ), yielding  $\sim 5.654 \times 10^{13} \text{ cm}^4/\text{F}^2$  for  $\text{WS}_2/\text{p-Si}$  and  $\sim 1.267 \times 10^{13} \text{ cm}^4/\text{F}^2$  for  $\text{MoS}_2/\text{p-Si}$ , corresponding to  $N_D$  values of  $4.085 \times 10^{22} \text{ cm}^{-3}$  and  $1.956 \times 10^{23} \text{ cm}^{-3}$ , respectively.

3. The conduction band edge ( $E_{CB}$ ) is calculated as:

$$E_{CB} = V_{fb} + kT \ln(N_D / N_{CB})$$

Where  $N_{CB}$  is the effective conduction band density of states:

$$N_{CB} = 2 \sqrt{\left( \frac{2\pi m_e^* kT}{h^2} \right)^3}$$

where  $m_e^*$  as effective mass ( $0.33m_0$  for  $\text{WS}_2$  and  $0.39m_0$  for  $\text{MoS}_2$ ) and  $h$  is Planck's constant ( $6.626 \times 10^{-34} \text{ J} \cdot \text{s}$ ). This gives  $N_{CB}$  values of  $4.746 \times 10^{24} \text{ cm}^{-3}$  for  $\text{WS}_2$  and  $1.049 \times 10^{25} \text{ cm}^{-3}$  for  $\text{MoS}_2$ . Therefore, the conduction band edges are  $-0.653 \text{ V}$  for  $\text{WS}_2$  and  $-0.556 \text{ V}$  for  $\text{MoS}_2$  vs. RHE.

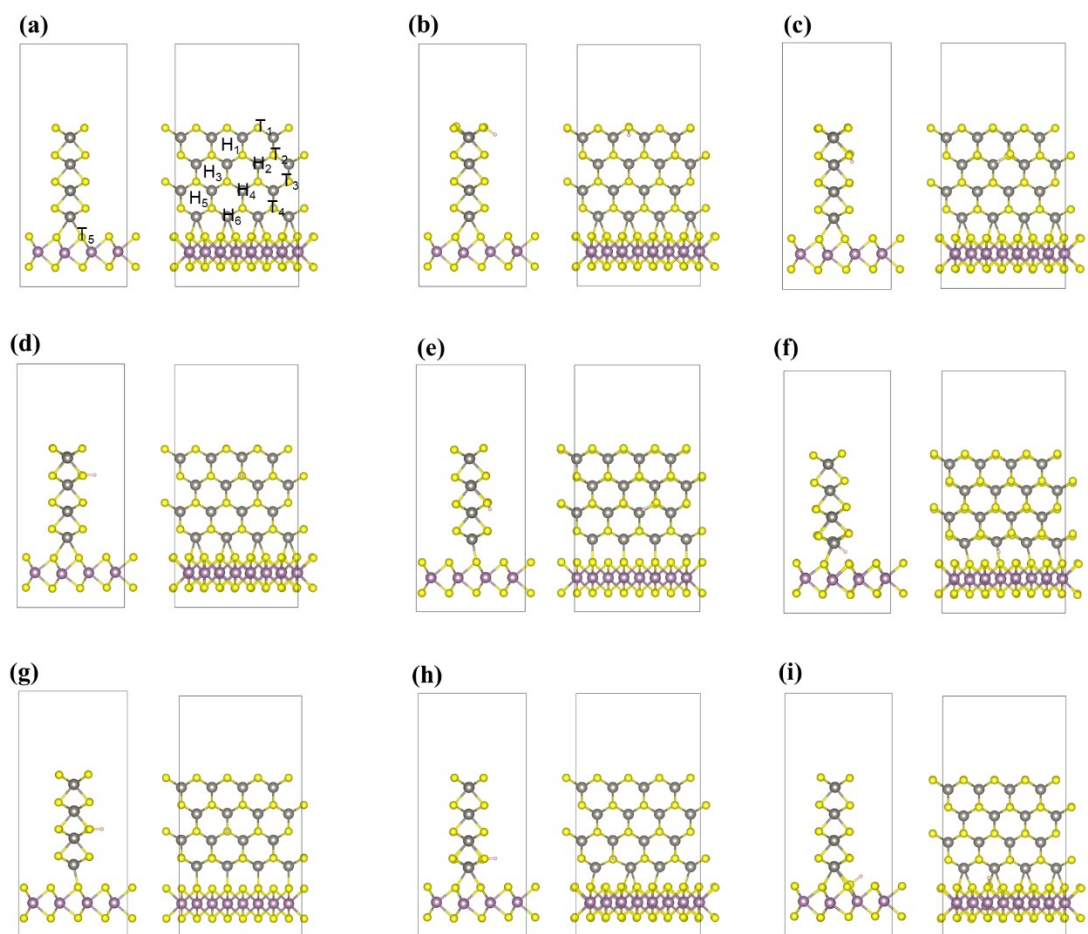

**Fig. S8** (a) the possible adsorption sites in the orthogonally joined WS<sub>2</sub>/MoS<sub>2</sub> heterostructure for the adsorbate, where the T and H represent the top and hollow sites; Optimized adsorption structures of a H atom on (b) H1 (= T1), (c) H2, (d) H3 (=T2), (e) H4, (f) H5 (=H6), (g) T3, (h) T4, and (i) T5 sites.

**(a)**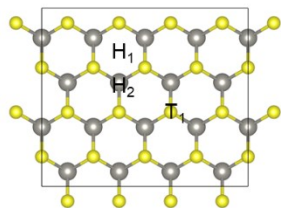**(b)**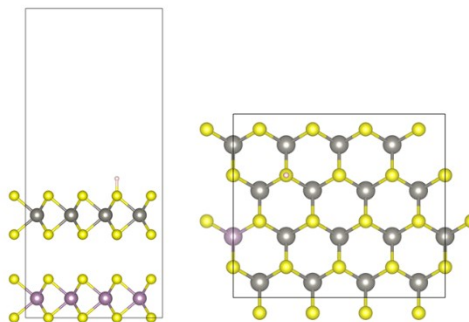**(c)**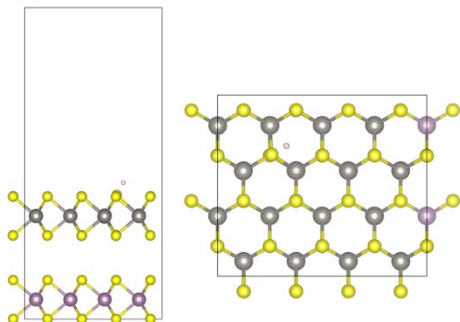**(d)**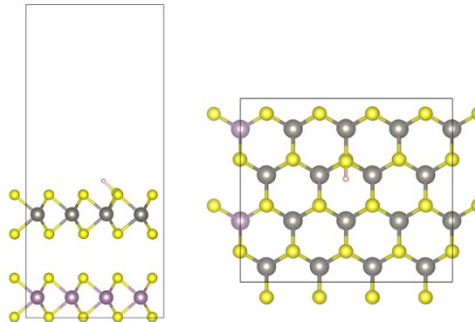

**Fig. S9** (a) the possible adsorption sites in the vertically stacked  $\text{WS}_2/\text{MoS}_2$  heterostructure for the adsorbate, where the T and H represent the top and hollow sites; Optimized adsorption structures of a H atom on (b) T1, (c) H1, and (d) H2 sites. We only considered the  $\text{WS}_2$  side since the  $\text{MoS}_2$  side is connected to the p-Si.

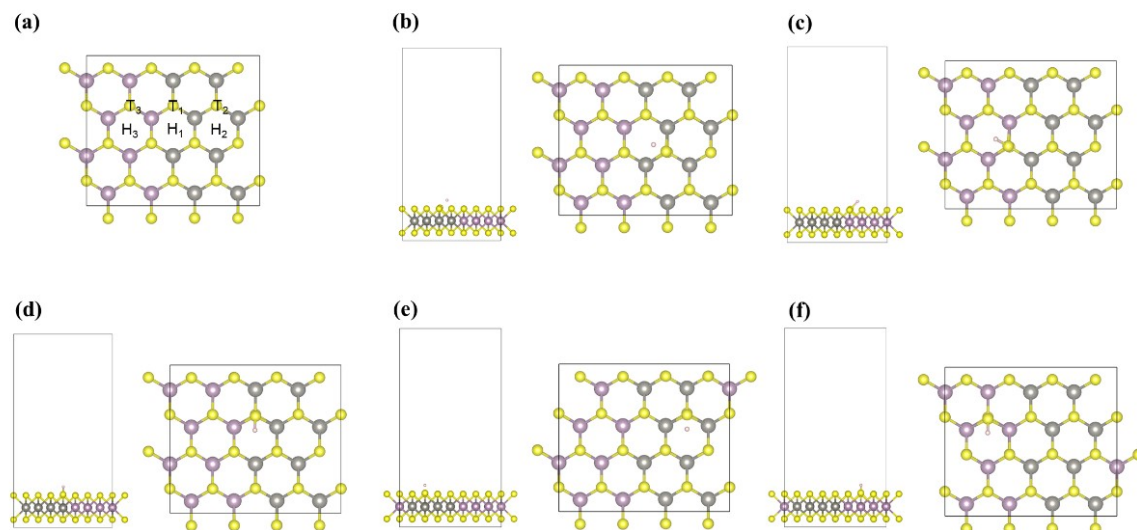

**Fig. S10** (a) the possible adsorption sites in the in-plane interconnected WS<sub>2</sub>/MoS<sub>2</sub> heterostructure for the adsorbate, where the T and H represent the top and hollow sites; Optimized adsorption structures of a H atom on (b) H<sub>1</sub> (=H<sub>2</sub>), (c) H<sub>3</sub>, (d) T<sub>1</sub>, (e) T<sub>2</sub>, and (f) T<sub>3</sub> sites.

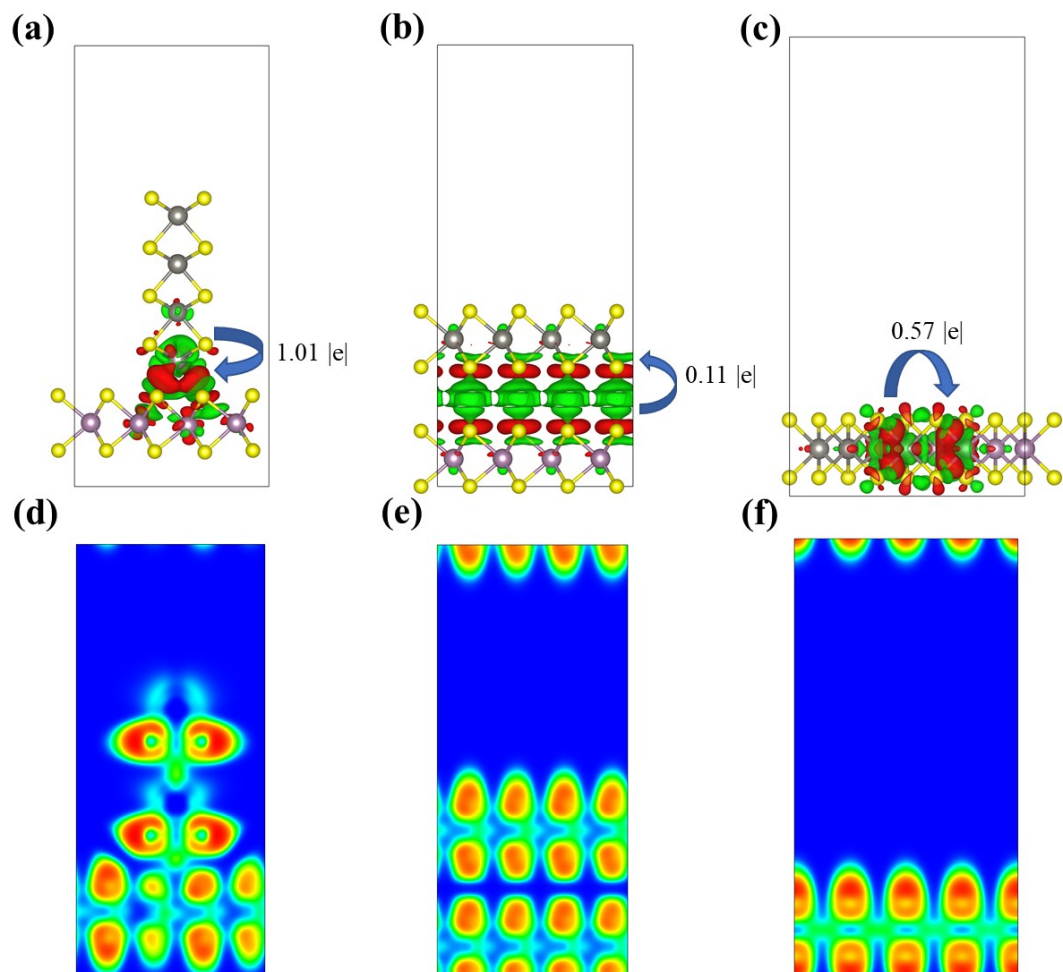

**Fig. S11** Calculated charge density difference (CDD) diagrams of (a) orthogonally jointed (isosurface level:  $0.05 \text{ |e|/Bohr}^3$ ), (b) vertically stacked (isosurface level:  $0.00005 \text{ |e|/Bohr}^3$ ), and (c) in-plane interconnected  $\text{WS}_2/\text{MoS}_2$  (isosurface level:  $0.005 \text{ |e|/Bohr}^3$ ) heterostructures. The Green and red represent the region of electron depletion and accumulation, respectively. Calculated electron localization function (ELF) diagrams of (d) orthogonally jointed, (e) vertically stacked, and (f) in-plane interconnected  $\text{WS}_2/\text{MoS}_2$  heterostructures.

## Reference:

- (1) Li, F.-S.; Fang, Y.-W.; Wu, Y.-T.; Wu, S.-W.; Ho, S.-Z.; Chen, C.-Y.; Chiang, C.-Y.; Chen, Y.-C.; Liu, H.-J. Self-Enhancement of Water Electrolysis by Electrolyte-Poled Ferroelectric Catalyst. *ACS Nano* **2023**, *17* (16), 16274-16286. DOI: 10.1021/acsnano.3c06371.
